# Supplementary material
Source: publisher figshare collection journal article supplement (https://gsajournals.figshare.com/ndownloader/files/13778777)
Supplement: Supplementary file 1 [file 13778777]

## Sheet: Sheet1
File S2: Comparisons of the genetic gain between Genomic-Assisted Recurrent Selection (GARS)
and Phenotypic Reccurent Selection (PRS) across the different trait genetic architectures and population size
GARS3 vs PRS, Genetic gain, oligogenic architecture
Generation	Population size	GARS/PRS	Mean	Std Error	Lower 95%	Upper 95%	Std Err Dif	Prob > |t|
1	par5_pop50k	GARS3	2.08649	0.02876	2.00303	2.17	0.04067	0.7378
1	par5_pop50k	PRS	2.06641	0.02876	1.98286	2.14998
2	par5_pop50k	GARS3	3.88427	0.05213	3.73294	4.03566	0.07373	<.0001
2	par5_pop50k	PRS	3.43624	0.05213	3.28489	3.58762
3	par5_pop50k	GARS3	4.78511	0.06369	4.60018	4.97004	0.09007	0.0101
3	par5_pop50k	PRS	4.44064	0.06369	4.25564	4.6255
4	par5_pop50k	GARS3	5.18087	0.07268	4.96989	5.39188	0.10279	0.7835
4	par5_pop50k	PRS	5.22251	0.07268	5.01142	5.43355
5	par5_pop50k	GARS3	5.45877	0.08038	5.22535	5.6921	0.11368	0.0492
5	par5_pop50k	PRS	5.78997	0.08038	5.55664	6.02339
6	par5_pop50k	GARS3	5.59098	0.08289	5.35036	5.83168	0.11722	0.002
6	par5_pop50k	PRS	6.13024	0.08289	5.88955	6.37087
7	par5_pop50k	GARS3	5.66535	0.08483	5.41897	5.91163	0.11997	0.0002
7	par5_pop50k	PRS	6.34334	0.08483	6.09701	6.58967
8	par5_pop50k	GARS3	5.69397	0.08523	5.44651	5.94152	0.12054	<.0001
8	par5_pop50k	PRS	6.45307	0.08523	6.20552	6.70054
9	par5_pop50k	GARS3	5.69553	0.08649	5.44444	5.94668	0.12231	<.0001
9	par5_pop50k	PRS	6.53263	0.08649	6.2815	6.78373
10	par5_pop50k	GARS3	5.71853	0.08715	5.4655	5.97156	0.12325	<.0001
10	par5_pop50k	PRS	6.57985	0.08715	6.32685	6.83291
1	par20_pop200k	GARS3	1.68657	0.01972	1.62934	1.74389	0.02789	0.6264
1	par20_pop200k	PRS	1.7066	0.01972	1.64937	1.76392
2	par20_pop200k	GARS3	3.73542	0.04244	3.61221	3.85868	0.06002	<.0001
2	par20_pop200k	PRS	3.18926	0.04244	3.0661	3.31243
3	par20_pop200k	GARS3	4.90476	0.05987	4.73093	5.07856	0.08466	0.0001
3	par20_pop200k	PRS	4.41885	0.05987	4.24504	4.59267
4	par20_pop200k	GARS3	5.69758	0.07166	5.4895	5.9056	0.10134	0.17
4	par20_pop200k	PRS	5.49206	0.07166	5.28395	5.7002
5	par20_pop200k	GARS3	6.20465	0.08394	5.96096	6.44832	0.11871	0.5585
5	par20_pop200k	PRS	6.30709	0.08394	6.06344	6.5508
6	par20_pop200k	GARS3	6.55629	0.09199	6.28915	6.82333	0.13009	0.0392
6	par20_pop200k	PRS	6.95392	0.09199	6.68684	7.22103
7	par20_pop200k	GARS3	6.73265	0.09857	6.4464	7.01887	0.1394	0.0005
7	par20_pop200k	PRS	7.4565	0.09857	7.17023	7.74269
8	par20_pop200k	GARS3	6.84682	0.10319	6.54711	7.14638	0.14594	<.0001
8	par20_pop200k	PRS	7.79417	0.10319	7.4946	8.09386
9	par20_pop200k	GARS3	6.91503	0.10532	6.60925	7.22088	0.14894	<.0001
9	par20_pop200k	PRS	8.04973	0.10532	7.74387	8.3555
10	par20_pop200k	GARS3	6.95035	0.10719	6.67772	7.30024	0.1516	<.0001
10	par20_pop200k	PRS	8.24217	0.10719	7.93086	8.55339
1	par100_pop1000k	GARS3	1.03574	0.01452	0.993567	1.07793	0.02053	0.9989
1	par100_pop1000k	PRS	1.03577	0.01452	0.993567	1.07793
2	par100_pop1000k	GARS3	3.2496	0.03492	3.14826	3.351	0.04939	<.0001
2	par100_pop1000k	PRS	2.58424	0.03492	2.48289	2.68563
3	par100_pop1000k	GARS3	4.60448	0.04931	4.46133	4.74771	0.06974	<.0001
3	par100_pop1000k	PRS	3.8507	0.04931	3.70747	3.99385
4	par100_pop1000k	GARS3	5.46054	0.06295	5.27777	5.64336	0.08903	0.0002
4	par100_pop1000k	PRS	4.96072	0.06295	4.77789	5.14349
5	par100_pop1000k	GARS3	6.02056	0.0746	5.804	6.23718	0.1055	0.6044
5	par100_pop1000k	PRS	5.93996	0.0746	5.72331	6.15664
6	par100_pop1000k	GARS3	6.37439	0.08271	6.13426	6.61455	0.11697	0.0433
6	par100_pop1000k	PRS	6.72461	0.08271	6.48439	6.96483
7	par100_pop1000k	GARS3	6.64814	0.09094	6.38412	6.91227	0.12861	0.0002
7	par100_pop1000k	PRS	7.35562	0.09094	7.0916	7.6196
8	par100_pop1000k	GARS3	6.83376	0.09757	6.5505	7.11708	0.13799	<.0001
8	par100_pop1000k	PRS	7.83288	0.09757	7.54952	8.11624
9	par100_pop1000k	GARS3	6.97403	0.10234	6.67683	7.27123	0.14474	<.0001
9	par100_pop1000k	PRS	8.16988	0.10234	7.8727	8.46711
10	par100_pop1000k	GARS3	7.14314	0.10568	6.76812	7.38181	0.14945	<.0001
10	par100_pop1000k	PRS	8.41021	0.10568	8.10343	8.71712
1	par200_pop2000k	GARS3	0.646967	0.00887	0.6212	0.672733	0.01254	0.8686
1	par200_pop2000k	PRS	0.643904	0.00887	0.618108	0.669641
2	par200_pop2000k	GARS3	3.01231	0.02717	2.93344	3.09128	0.03842	<.0001
2	par200_pop2000k	PRS	2.25029	0.02717	2.17133	2.32917
3	par200_pop2000k	GARS3	4.33173	0.04245	4.20852	4.455	0.06004	<.0001
3	par200_pop2000k	PRS	3.51429	0.04245	3.39105	3.63753
4	par200_pop2000k	GARS3	5.18642	0.05596	5.02393	5.34889	0.07914	<.0001
4	par200_pop2000k	PRS	4.62466	0.05596	4.46222	4.78717
5	par200_pop2000k	GARS3	5.73928	0.06706	5.54457	5.93401	0.09483	0.2333
5	par200_pop2000k	PRS	5.57234	0.06706	5.3776	5.76704
6	par200_pop2000k	GARS3	6.1304	0.07692	5.90707	6.35379	0.10878	0.1547
6	par200_pop2000k	PRS	6.35922	0.07692	6.13588	6.5826
7	par200_pop2000k	GARS3	6.39776	0.08592	6.14825	6.64724	0.12151	0.0014
7	par200_pop2000k	PRS	6.97795	0.08592	6.72851	7.22736
8	par200_pop2000k	GARS3	6.59084	0.09294	6.32096	6.86073	0.13144	<.0001
8	par200_pop2000k	PRS	7.43383	0.09294	7.1639	7.70367
9	par200_pop2000k	GARS3	6.72302	0.09826	6.43772	7.00827	0.13895	<.0001
9	par200_pop2000k	PRS	7.75808	0.09826	7.4728	8.04335
10	par200_pop2000k	GARS3	6.817	0.10161	6.52194	7.11207	0.14369	<.0001
10	par200_pop2000k	PRS	7.99072	0.10161	7.69572	8.28571
GARS3 vs PRS, genetic gain, polygenic architecture
Gen	Population size	GARS/PRS	Mean	Std Error	Lower 95%	Upper 95%	Std Error	Prob > |t|
1	par5_pop50k	GARS3	1.33127	0.02065	1.2575	1.40505	0.02921	0.7164
1	par5_pop50k	PRS	1.35052	0.02065	1.27674	1.42429
2	par5_pop50k	GARS3	3.12481	0.03421	3.00259	3.24703	0.04838	<.0001
2	par5_pop50k	PRS	2.38927	0.03421	2.26707	2.51149
3	par5_pop50k	GARS3	4.3123	0.04434	4.15388	4.47072	0.06271	<.0001
3	par5_pop50k	PRS	3.17367	0.04434	3.01525	3.3321
4	par5_pop50k	GARS3	5.18893	0.05331	4.9985	5.37937	0.07539	<.0001
4	par5_pop50k	PRS	3.84858	0.05331	3.65815	4.03902
5	par5_pop50k	GARS3	5.81453	0.06279	5.5902	6.03886	0.0888	<.0001
5	par5_pop50k	PRS	4.46381	0.06279	4.23949	4.68813
6	par5_pop50k	GARS3	6.24896	0.06628	6.01216	6.48574	0.09374	<.0001
6	par5_pop50k	PRS	4.99658	0.06628	4.75978	5.23337
7	par5_pop50k	GARS3	6.4932	0.07003	6.24301	6.74339	0.09904	<.0001
7	par5_pop50k	PRS	5.39989	0.07003	5.14969	5.65009
8	par5_pop50k	GARS3	6.68737	0.07262	6.42793	6.94679	0.1027	<.0001
8	par5_pop50k	PRS	5.81599	0.07262	5.55656	6.07542
9	par5_pop50k	GARS3	6.77025	0.07569	6.49984	7.04067	0.10705	0.0012
9	par5_pop50k	PRS	6.13139	0.07569	5.86098	6.40181
10	par5_pop50k	GARS3	6.83289	0.07843	6.55272	7.11308	0.11091	0.0425
10	par5_pop50k	PRS	6.42258	0.07843	6.14239	6.70277
1	par20_pop200k	GARS3	1.08432	0.01761	1.02139	1.14725	0.02491	0.934
1	par20_pop200k	PRS	1.08058	0.01761	1.01766	1.1435
2	par20_pop200k	GARS3	3.0874	0.03618	2.95815	3.21665	0.05117	<.0001
2	par20_pop200k	PRS	2.15447	0.03618	2.02522	2.28371
3	par20_pop200k	GARS3	4.50864	0.04939	4.33221	4.68507	0.06984	<.0001
3	par20_pop200k	PRS	3.02553	0.04939	2.84909	3.20196
4	par20_pop200k	GARS3	5.71319	0.06079	5.49603	5.93034	0.08596	<.0001
4	par20_pop200k	PRS	3.87495	0.06079	3.65779	4.0921
5	par20_pop200k	GARS3	6.67194	0.07094	6.4185	6.9254	0.10033	<.0001
5	par20_pop200k	PRS	4.65043	0.07094	4.39699	4.90388
6	par20_pop200k	GARS3	7.45879	0.0766	7.18514	7.73245	0.10833	<.0001
6	par20_pop200k	PRS	5.4017	0.0766	5.12804	5.67534
7	par20_pop200k	GARS3	8.06552	0.08603	7.75817	8.37286	0.12166	<.0001
7	par20_pop200k	PRS	6.17097	0.08603	5.86362	6.4783
8	par20_pop200k	GARS3	8.57849	0.0935	8.24446	8.91252	0.13223	<.0001
8	par20_pop200k	PRS	6.86647	0.0935	6.53243	7.20049
9	par20_pop200k	GARS3	8.93981	0.09925	8.58524	9.2944	0.14037	<.0001
9	par20_pop200k	PRS	7.51644	0.09925	7.16187	7.87103
10	par20_pop200k	GARS3	9.26098	0.1053	8.8848	9.63716	0.14892	<.0001
10	par20_pop200k	PRS	8.13729	0.1053	7.76111	8.51348
1	par100_pop1000k	GARS3	0.651757	0.00807	0.622917	0.680598	0.01141	0.9083
1	par100_pop1000k	PRS	0.649373	0.00807	0.620543	0.678207
2	par100_pop1000k	GARS3	2.7454	0.02075	2.67125	2.81953	0.02935	<.0001
2	par100_pop1000k	PRS	1.76852	0.02075	1.69438	1.84266
3	par100_pop1000k	GARS3	4.27257	0.03081	4.1625	4.38264	0.04357	<.0001
3	par100_pop1000k	PRS	2.73887	0.03081	2.6288	2.84895
4	par100_pop1000k	GARS3	5.56461	0.04013	5.42123	5.70799	0.05676	<.0001
4	par100_pop1000k	PRS	3.67299	0.04013	3.5296	3.81636
5	par100_pop1000k	GARS3	6.62064	0.0483	6.44808	6.79319	0.06831	<.0001
5	par100_pop1000k	PRS	4.57791	0.0483	4.40536	4.75047
6	par100_pop1000k	GARS3	7.52731	0.0554	7.3294	7.72524	0.07835	<.0001
6	par100_pop1000k	PRS	5.46071	0.0554	5.26279	5.65862
7	par100_pop1000k	GARS3	8.29905	0.06323	8.07315	8.52495	0.08942	<.0001
7	par100_pop1000k	PRS	6.32199	0.06323	6.09609	6.54788
8	par100_pop1000k	GARS3	8.95383	0.07089	8.70058	9.20708	0.10025	<.0001
8	par100_pop1000k	PRS	7.15037	0.07089	6.89712	7.40362
9	par100_pop1000k	GARS3	9.47906	0.07727	9.20299	9.75513	0.10928	<.0001
9	par100_pop1000k	PRS	7.95966	0.07727	7.68359	8.23572
10	par100_pop1000k	GARS3	9.93457	0.08294	9.63826	10.2309	0.1173	<.0001
10	par100_pop1000k	PRS	8.73514	0.08294	8.43884	9.03145
1	par200_pop2000k	GARS3	0.380984	0.00661	0.357373	0.404583	0.00935	0.668
1	par200_pop2000k	PRS	0.388255	0.00661	0.364638	0.411866
2	par200_pop2000k	GARS3	2.51752	0.02141	2.44103	2.594	0.03028	<.0001
2	par200_pop2000k	PRS	1.51626	0.02141	1.43976	1.59275
3	par200_pop2000k	GARS3	4.04449	0.03323	3.92578	4.16319	0.04699	<.0001
3	par200_pop2000k	PRS	2.47684	0.03323	2.35813	2.59554
4	par200_pop2000k	GARS3	5.36007	0.04437	5.20158	5.51857	0.06274	<.0001
4	par200_pop2000k	PRS	3.39561	0.04437	3.2371	3.55411
5	par200_pop2000k	GARS3	6.49111	0.05428	6.29719	6.68502	0.07676	<.0001
5	par200_pop2000k	PRS	4.29908	0.05428	4.10516	4.49299
6	par200_pop2000k	GARS3	7.41266	0.06449	7.18226	7.64306	0.09121	<.0001
6	par200_pop2000k	PRS	5.18445	0.06449	4.95406	5.41486
7	par200_pop2000k	GARS3	8.19693	0.07341	7.93467	8.45918	0.10382	<.0001
7	par200_pop2000k	PRS	6.05301	0.07341	5.79074	6.31527
8	par200_pop2000k	GARS3	8.86428	0.08181	8.57201	9.15654	0.1157	<.0001
8	par200_pop2000k	PRS	6.88351	0.08181	6.59125	7.17578
9	par200_pop2000k	GARS3	9.41094	0.08917	9.09237	9.72949	0.1261	<.0001
9	par200_pop2000k	PRS	7.69561	0.08917	7.37705	8.01417
10	par200_pop2000k	GARS3	9.87907	0.0957	9.53719	10.221	0.13534	<.0001
10	par200_pop2000k	PRS	8.48562	0.0957	8.14373	8.8275
GARS2 vs PRS, genetic gain, oligogenic architecture
Gen	Population size	GARS/PRS	Mean	Std Error	Lower 95%	Upper 95%	Std Error	Prob > |t|
1	par5_pop50k	GARS2	2.08649	0.02065	2.01	2.16	0.029	0.7164
1	par5_pop50k	PRS	2.06641	0.021	1.99	2.14
2	par5_pop50k	GARS2	3.36919	0.033	3.26	3.48	0.046665	<.0001
2	par5_pop50k	PRS	3.43625	0.033	3.32	3.55
3	par5_pop50k	GARS2	4.24726	0.042535	4.1	4.39	0.060155	<.0001
3	par5_pop50k	PRS	4.44064	0.042535	4.3	4.59
4	par5_pop50k	GARS2	4.78512	0.05103	4.61	4.96	0.07217	<.0001
4	par5_pop50k	PRS	5.22251	0.05103	5.05	5.4
5	par5_pop50k	GARS2	5.08451	0.05989	4.88	5.29	0.0847	<.0001
5	par5_pop50k	PRS	5.78996	0.05989	5.59	5.99
6	par5_pop50k	GARS2	5.28102	0.063715	5.06	5.5	0.09011	<.0001
6	par5_pop50k	PRS	6.13023	0.063715	5.91	6.35
7	par5_pop50k	GARS2	5.45876	0.068595	5.22	5.7	0.097005	<.0001
7	par5_pop50k	PRS	6.34334	0.068595	6.1	6.58
8	par5_pop50k	GARS2	5.54456	0.071385	5.29	5.8	0.10095	<.0001
8	par5_pop50k	PRS	6.45308	0.071385	6.2	6.7
9	par5_pop50k	GARS2	5.62367	0.07501	5.36	5.89	0.106085	0.001
9	par5_pop50k	PRS	6.53263	0.07501	6.27	6.8
10	par5_pop50k	GARS2	5.66534	0.077795	5.39	5.94	0.110015	0.0231
10	par5_pop50k	PRS	6.57985	0.077795	6.3	6.86
1	par20_pop200k	GARS2	1.68658	0.01761	1.62	1.75	0.02491	0.4213
1	par20_pop200k	PRS	1.7066	0.01761	1.64	1.77
2	par20_pop200k	GARS2	3.1887	0.034665	3.07	3.31	0.049025	<.0001
2	par20_pop200k	PRS	3.18926	0.034665	3.07	3.31
3	par20_pop200k	GARS2	4.21531	0.046685	4.06	4.37	0.066015	<.0001
3	par20_pop200k	PRS	4.41885	0.046685	4.26	4.58
4	par20_pop200k	GARS2	4.90475	0.057835	4.71	5.1	0.08179	<.0001
4	par20_pop200k	PRS	5.49207	0.057835	5.3	5.69
5	par20_pop200k	GARS2	5.44319	0.06747	5.21	5.67	0.09542	<.0001
5	par20_pop200k	PRS	6.30709	0.06747	6.08	6.54
6	par20_pop200k	GARS2	5.88888	0.074245	5.63	6.15	0.105	<.0001
6	par20_pop200k	PRS	6.95392	0.074245	6.7	7.21
7	par20_pop200k	GARS2	6.20466	0.082845	5.92	6.49	0.117155	<.0001
7	par20_pop200k	PRS	7.4565	0.082845	7.17	7.74
8	par20_pop200k	GARS2	6.44096	0.090145	6.13	6.75	0.12749	<.0001
8	par20_pop200k	PRS	7.79416	0.090145	7.48	8.1
9	par20_pop200k	GARS2	6.62976	0.096385	6.3	6.96	0.13631	<.0001
9	par20_pop200k	PRS	8.04973	0.096385	7.72	8.38
10	par20_pop200k	GARS2	6.73265	0.10245	6.38	7.09	0.14489	<.0001
10	par20_pop200k	PRS	8.24217	0.10245	7.89	8.6
1	par100_pop1000k	GARS2	1.03573	0.00807	1.01	1.06	0.01141	0.564
1	par100_pop1000k	PRS	1.03577	0.00807	1.01	1.06
2	par100_pop1000k	GARS2	2.66375	0.019625	2.6	2.73	0.027755	<.0001
2	par100_pop1000k	PRS	2.58425	0.019625	2.52	2.65
3	par100_pop1000k	GARS2	3.76728	0.02898	3.67	3.86	0.040985	<.0001
3	par100_pop1000k	PRS	3.85071	0.02898	3.75	3.95
4	par100_pop1000k	GARS2	4.60447	0.037595	4.48	4.73	0.053175	<.0001
4	par100_pop1000k	PRS	4.96072	0.037595	4.84	5.09
5	par100_pop1000k	GARS2	5.22984	0.04566	5.08	5.38	0.064575	<.0001
5	par100_pop1000k	PRS	5.93996	0.04566	5.79	6.09
6	par100_pop1000k	GARS2	5.67585	0.05287	5.5	5.86	0.074775	<.0001
6	par100_pop1000k	PRS	6.72461	0.05287	6.54	6.9
7	par100_pop1000k	GARS2	6.02056	0.060055	5.82	6.22	0.084925	<.0001
7	par100_pop1000k	PRS	7.35562	0.060055	7.15	7.56
8	par100_pop1000k	GARS2	6.26845	0.067195	6.04	6.5	0.09503	<.0001
8	par100_pop1000k	PRS	7.83287	0.067195	7.61	8.06
9	par100_pop1000k	GARS2	6.46982	0.073415	6.22	6.72	0.103825	<.0001
9	par100_pop1000k	PRS	8.16987	0.073415	7.92	8.42
10	par100_pop1000k	GARS2	6.64814	0.079455	6.38	6.92	0.11237	<.0001
10	par100_pop1000k	PRS	8.41022	0.079455	8.14	8.68
1	par200_pop2000k	GARS2	0.64697	0.00661	0.62	0.67	0.00935	0.456
1	par200_pop2000k	PRS	0.643911	0.00661	0.62	0.67
2	par200_pop2000k	GARS2	2.41382	0.02005	2.35	2.48	0.028355	<.0001
2	par200_pop2000k	PRS	2.25029	0.02005	2.18	2.32
3	par200_pop2000k	GARS2	3.52157	0.030835	3.42	3.62	0.043605	<.0001
3	par200_pop2000k	PRS	3.5143	0.030835	3.41	3.62
4	par200_pop2000k	GARS2	4.33174	0.041445	4.19	4.47	0.058605	<.0001
4	par200_pop2000k	PRS	4.62466	0.041445	4.49	4.76
5	par200_pop2000k	GARS2	4.9376	0.050895	4.77	5.11	0.07197	<.0001
5	par200_pop2000k	PRS	5.57234	0.050895	5.4	5.74
6	par200_pop2000k	GARS2	5.39547	0.060365	5.19	5.6	0.08537	<.0001
6	par200_pop2000k	PRS	6.35923	0.060365	6.16	6.56
7	par200_pop2000k	GARS2	5.73928	0.068935	5.51	5.97	0.09749	<.0001
7	par200_pop2000k	PRS	6.97795	0.068935	6.75	7.21
8	par200_pop2000k	GARS2	6.02162	0.077285	5.76	6.28	0.1093	<.0001
8	par200_pop2000k	PRS	7.43383	0.077285	7.17	7.69
9	par200_pop2000k	GARS2	6.23205	0.08487	5.94	6.52	0.120025	<.0001
9	par200_pop2000k	PRS	7.75807	0.08487	7.47	8.05
10	par200_pop2000k	GARS2	6.39775	0.0916	6.09	6.71	0.129545	<.0001
10	par200_pop2000k	PRS	7.99071	0.0916	7.68	8.3
GARS2 vs PRS, genetic gain, polygenic architecture
Gen	Population size	GARS/PRS	Mean	Std Error	Lower 95%	Upper 95%	Std Error	Prob > |t|
1	par5_pop50k	GARS2	1.33127	0.02065	1.2575	1.40505	0.02921	0.7164
1	par5_pop50k	PRS	1.35052	0.02065	1.27674	1.42429
2	par5_pop50k	GARS2	2.6426	0.03179	2.52904	2.75616	0.04495	0.0021
2	par5_pop50k	PRS	2.38927	0.03179	2.27571	2.50283
3	par5_pop50k	GARS2	3.51397	0.04073	3.36848	3.65947	0.0576	0.0013
3	par5_pop50k	PRS	3.17367	0.04073	3.02817	3.31917
4	par5_pop50k	GARS2	4.3123	0.04875	4.13812	4.48647	0.06895	0.0003
4	par5_pop50k	PRS	3.84858	0.04875	3.6744	4.02275
5	par5_pop50k	GARS2	4.91519	0.05699	4.71159	5.11879	0.0806	0.0023
5	par5_pop50k	PRS	4.46381	0.05699	4.26022	4.66741
6	par5_pop50k	GARS2	5.37365	0.06115	5.1552	5.5921	0.08648	0.017
6	par5_pop50k	PRS	4.99658	0.06115	4.77813	5.21504
7	par5_pop50k	GARS2	5.81453	0.06716	5.57462	6.05446	0.09497	0.0169
7	par5_pop50k	PRS	5.39989	0.06716	5.15998	5.6398
8	par5_pop50k	GARS2	6.09768	0.07015	5.84708	6.34828	0.0992	0.1186
8	par5_pop50k	PRS	5.81599	0.07015	5.5654	6.06658
9	par5_pop50k	GARS2	6.34424	0.07433	6.0787	6.60978	0.10512	0.2651
9	par5_pop50k	PRS	6.13139	0.07433	5.86583	6.39694
10	par5_pop50k	GARS2	6.4932	0.07716	6.21754	6.76886	0.10912	0.7213
10	par5_pop50k	PRS	6.42258	0.07716	6.14692	6.69822
1	par20_pop200k	GARS2	1.08432	0.01761	1.02139	1.14725	0.02491	0.934
1	par20_pop200k	PRS	1.08058	0.01761	1.01766	1.1435
2	par20_pop200k	GARS2	2.55326	0.03315	2.43484	2.67168	0.04688	<.0001
2	par20_pop200k	PRS	2.15447	0.03315	2.03603	2.2729
3	par20_pop200k	GARS2	3.57517	0.04398	3.41806	3.73226	0.06219	<.0001
3	par20_pop200k	PRS	3.02553	0.04398	2.86842	3.18264
4	par20_pop200k	GARS2	4.50864	0.05488	4.31255	4.70471	0.07762	<.0001
4	par20_pop200k	PRS	3.87495	0.05488	3.67888	4.07103
5	par20_pop200k	GARS2	5.31562	0.064	5.08697	5.54426	0.09051	<.0001
5	par20_pop200k	PRS	4.65043	0.064	4.42179	4.87908
6	par20_pop200k	GARS2	6.03773	0.07189	5.78089	6.29458	0.10167	0.0007
6	par20_pop200k	PRS	5.4017	0.07189	5.14486	5.65853
7	par20_pop200k	GARS2	6.67194	0.07966	6.38737	6.95652	0.11265	0.015
7	par20_pop200k	PRS	6.17097	0.07966	5.88639	6.45554
8	par20_pop200k	GARS2	7.20684	0.08679	6.89678	7.51692	0.12275	0.1274
8	par20_pop200k	PRS	6.86647	0.08679	6.55639	7.17654
9	par20_pop200k	GARS2	7.69715	0.09352	7.36306	8.03123	0.13225	0.4516
9	par20_pop200k	PRS	7.51644	0.09352	7.18236	7.85053
10	par20_pop200k	GARS2	8.06552	0.0996	7.70969	8.42134	0.14086	0.7788
10	par20_pop200k	PRS	8.13729	0.0996	7.78147	8.49312
1	par100_pop1000k	GARS2	0.651757	0.00807	0.622917	0.680598	0.01141	0.9083
1	par100_pop1000k	PRS	0.649373	0.00807	0.620543	0.678207
2	par100_pop1000k	GARS2	2.18063	0.0185	2.11457	2.2467	0.02616	<.0001
2	par100_pop1000k	PRS	1.76852	0.0185	1.70245	1.8346
3	par100_pop1000k	GARS2	3.2867	0.02715	3.18969	3.3837	0.0384	<.0001
3	par100_pop1000k	PRS	2.73887	0.02715	2.64187	2.83589
4	par100_pop1000k	GARS2	4.27257	0.03506	4.1473	4.39784	0.04959	<.0001
4	par100_pop1000k	PRS	3.67299	0.03506	3.54772	3.79824
5	par100_pop1000k	GARS2	5.1489	0.04302	4.99522	5.30259	0.06084	<.0001
5	par100_pop1000k	PRS	4.57791	0.04302	4.42422	4.73159
6	par100_pop1000k	GARS2	5.93823	0.05034	5.75837	6.11808	0.0712	0.0003
6	par100_pop1000k	PRS	5.46071	0.05034	5.28085	5.64056
7	par100_pop1000k	GARS2	6.62064	0.05688	6.41745	6.82382	0.08043	0.0417
7	par100_pop1000k	PRS	6.32199	0.05688	6.1188	6.52516
8	par100_pop1000k	GARS2	7.24331	0.0635	7.01643	7.47018	0.08981	0.5685
8	par100_pop1000k	PRS	7.15037	0.0635	6.9235	7.37725
9	par100_pop1000k	GARS2	7.79981	0.06956	7.55132	8.0483	0.09837	0.3708
9	par100_pop1000k	PRS	7.95966	0.06956	7.71116	8.20815
10	par100_pop1000k	GARS2	8.29905	0.07597	8.02764	8.57043	0.10744	0.0262
10	par100_pop1000k	PRS	8.73514	0.07597	8.46375	9.00654
1	par200_pop2000k	GARS2	0.380984	0.00661	0.357373	0.404583	0.00935	0.668
1	par200_pop2000k	PRS	0.388255	0.00661	0.364638	0.411866
2	par200_pop2000k	GARS2	1.94666	0.01869	1.87989	2.01342	0.02643	<.0001
2	par200_pop2000k	PRS	1.51626	0.01869	1.44949	1.58303
3	par200_pop2000k	GARS2	3.05654	0.02844	2.95495	3.15813	0.04022	<.0001
3	par200_pop2000k	PRS	2.47684	0.02844	2.37525	2.57842
4	par200_pop2000k	GARS2	4.04449	0.03852	3.90688	4.1821	0.05447	<.0001
4	par200_pop2000k	PRS	3.39561	0.03852	3.25799	3.53321
5	par200_pop2000k	GARS2	4.94563	0.04751	4.77592	5.11534	0.06718	<.0001
5	par200_pop2000k	PRS	4.29908	0.04751	4.12937	4.46879
6	par200_pop2000k	GARS2	5.7493	0.05624	5.54839	5.95022	0.07953	0.0001
6	par200_pop2000k	PRS	5.18445	0.05624	4.98355	5.38536
7	par200_pop2000k	GARS2	6.49111	0.06446	6.26082	6.72139	0.09116	0.0086
7	par200_pop2000k	PRS	6.05301	0.06446	5.82272	6.2833
8	par200_pop2000k	GARS2	7.11789	0.07276	6.85797	7.37783	0.1029	0.2101
8	par200_pop2000k	PRS	6.88351	0.07276	6.62359	7.14344
9	par200_pop2000k	GARS2	7.69	0.08057	7.40216	7.97784	0.11395	0.9784
9	par200_pop2000k	PRS	7.69561	0.08057	7.40775	7.98344
10	par200_pop2000k	GARS2	8.19693	0.0875	7.88433	8.50955	0.12375	0.1993
10	par200_pop2000k	PRS	8.48562	0.0875	8.17301	8.79822
